# Supplementary material for: Search for morphological indicators that predict implantation by principal component analysis using images of blastocyst
Source: PeerJ journal article supplement (doi:10.7717/peerj.13441), 2022-05-16

**A**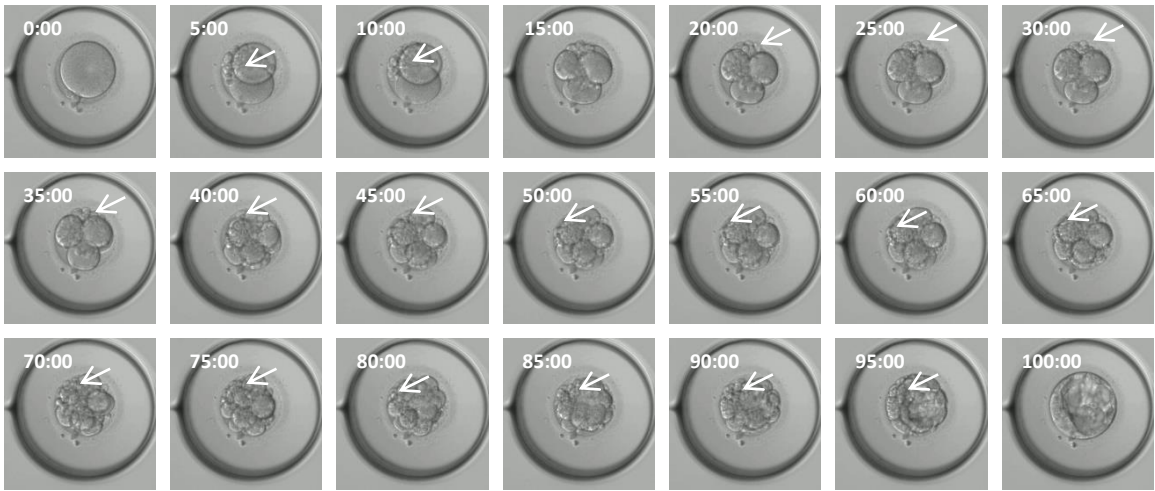**B**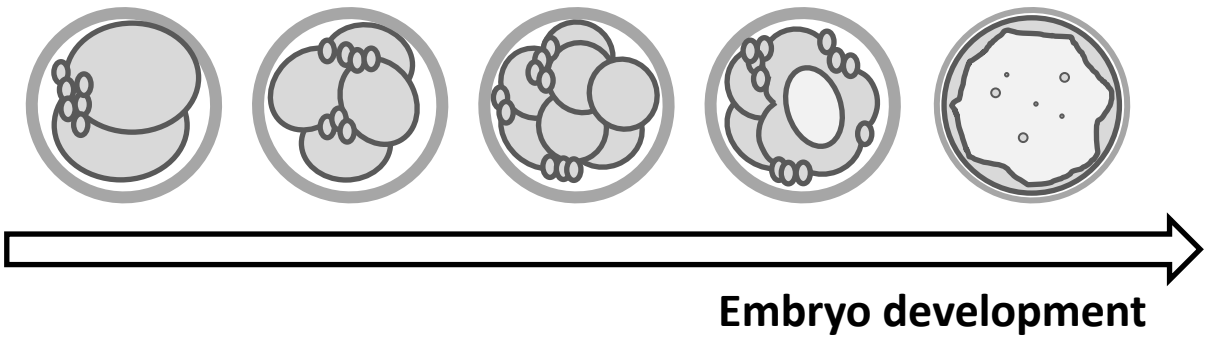

Supplement: Suppemental_Figure_1.pdf [file Suppemental_Figure_1.pdf]
