# Supplementary material for: Search for morphological indicators that predict implantation by principal component analysis using images of blastocyst
Source: PeerJ. 2022 May 16;10:e13441. doi: 10.7717/peerj.13441 (PMC9119295; doi:10.7717/peerj.13441)
Supplement: Supplemental Information 1 [file peerj-10-13441-s001.xlsx]

## Sheet: Sheet1
grainy	non-grainy		grainy/non-grainy	hcg	gardner
33	36		grainy	-	4AA
30	35		grainy	-	4AB
37	30		non-grainy	+	4BB
31	38		non-grainy	-	4AB
31	39		grainy	-	4AB
32	28		non-grainy	-	4BB
37	26		non-grainy	-	3AB
28	35		non-grainy	+	4BC
34	35		non-grainy	-	4BB
33	29		grainy	+	4AA
34	37		non-grainy	-	3AB
33	30		non-grainy	-	4AB
32	37		grainy	-	4AB
38	38		non-grainy	-	4AB
32	34		non-grainy	-	3AB
29	39		grainy	+	4AA
29	30		grainy	+	5BB
39	31		grainy	+	4AA
32	37		non-grainy	-	4AA
31	37		non-grainy	+	4AB
32	37		non-grainy	+	3AB
34	29		grainy	+	4AA
31	34		grainy	+	4AA
32	32		non-grainy	-	3BB
38	33		grainy	+	4AA
34	38		grainy	-	4AA
36	31		grainy	+	4AA
34	28		grainy	-	4AA
31	40		grainy	+	4AA
39	33		non-grainy	+	4AB
32	39		grainy	+	4AA
32	35		non-grainy	-	4AB
29	32		grainy	+	4BB
33	34		non-grainy	+	3AA
34	38		grainy	-	3AA
36	33		non-grainy	-	4BC
30	35		grainy	+	4AA
32	37		grainy	+	4AA
35	35		non-grainy	-	4CB
34	31		grainy	+	4AA
29	30		grainy	-	4AA
38	35		grainy	+	4AA
39	29		grainy	+	4AA
35	30		grainy	+	4AA
34	36		non-grainy	-	4AB
32	34		grainy	+	3AA
40	30		grainy	+	4AB
38	32		grainy	+	4AA
34	39		grainy	-	4AA
29	32		grainy	-	4AA
33	35		grainy	+	4AB
31	35		grainy	+	4AA
32	37		non-grainy	-	4BB
28	33		non-grainy	+	4BB
35	34		non-grainy	-	4BA
29	35		grainy	-	3AB
34	36		grainy	+	4AA
35	37		grainy	+	5AB
37	34		grainy	+	4AA
35	32		grainy	+	4AA
36			non-grainy	+	4AB
34			non-grainy	+	4AB
38			grainy	+	4AB
30			grainy	-	4AB
30			non-grainy	+	4AB
34			non-grainy	-	4AA
34			non-grainy	-	4AB
39			grainy	+	4AB
35			grainy	+	4BB
39			non-grainy	-	3AA
38			grainy	-	3BC
29			non-grainy	-	4AB
35			grainy	-	4AB
32			grainy	+	4AA
30			grainy	+	4AA
37			non-grainy	-	4AA
31			non-grainy	-	4AB
31			non-grainy	-	4AB
35			non-grainy	+	5AB
34			grainy	+	4AB
33			grainy	+	4AB
31			non-grainy	+	3AB
29			non-grainy	+	4AA
29			grainy	-	4BB
30			non-grainy	-	4BB
			non-grainy	-	4AB
			non-grainy	-	4AB
			non-grainy	+	4AA
			grainy	-	4AA
			grainy	+	4AB
			grainy	+	4AB
			non-grainy	-	4AB
			grainy	+	4AA
			grainy	+	4AA
			non-grainy	-	4AA
			non-grainy	+	4AB
			grainy	+	4AA
			non-grainy	+	4AA
			non-grainy	+	4AB
			non-grainy	+	3AB
			grainy	+	4AA
			grainy	+	4AA
			non-grainy	-	4AA
			grainy	-	4AA
			grainy	-	4AB
			non-grainy	+	4AB
			grainy	-	4AA
			grainy	+	4AB
			non-grainy	+	4AB
			non-grainy	-	3AB
			grainy	-	4AA
			grainy	+	4AB
			non-grainy	-	3AB
			grainy	+	4AA
			grainy	-	4AB
			non-grainy	-	4AB
			grainy	+	4AB
			grainy	+	4AA
			non-grainy	-	3BA
			grainy	+	4BA
			non-grainy	-	4AB
			grainy	+	4AB
			non-grainy	-	4AB
			non-grainy	-	4AB
			non-grainy	-	3BB
			non-grainy	-	3CB
			non-grainy	-	4BB
			grainy	+	3AA
			grainy	+	4AB
			non-grainy	-	4AB
			non-grainy	+	3AB
			grainy	-	4AB
			grainy	+	4AA
			grainy	+	4AA
			non-grainy	+	4AB
			non-grainy	-	4AB
			non-grainy	+	4AA
			grainy	-	4AB
			grainy	-	4AA
			grainy	+	4AA
			non-grainy	-	4AA
			grainy	+	4AB
			grainy	+	4AA
			grainy	-	4AA
			non-grainy	+	4AB
			non-grainy	-	4AB
			grainy	-	4AA
			grainy	-	4AA
			grainy	-	4AA
			grainy	-	4AA
			grainy	+	4AB
			grainy	+	5AA
			non-grainy	-	4AB
			grainy	-	4AA
			non-grainy	-	4AB
			grainy	+	4AA
			non-grainy	-	5AB
			non-grainy	-	3AB
			grainy	+	4AA
			grainy	-	4AA
			grainy	+	4AA
			non-grainy	+	3AB
			grainy	-	4AA
			non-grainy	+	4AB
			grainy	+	4AA
			non-grainy	-	3BC
			non-grainy	+	4AA
			grainy	+	4AB
			non-grainy	+	4AB
			non-grainy	+	4AA
			grainy	+	4AB
			grainy	+	4AA
			non-grainy	-	4BC
			grainy	+	4AB
			grainy	+	4AA
			non-grainy	-	4AA
			non-grainy	-	4AB
			non-grainy	+	4AA
			non-grainy	+	4AB
			grainy	-	4AA
			grainy	+	4AA
			grainy	+	4BA
			non-grainy	+	4AB
			grainy	+	4AA
			non-grainy	-	4AB
			grainy	+	4AA
			non-grainy	-	3BB
			non-grainy	-	3BC
			non-grainy	-	4BB
			non-grainy	-	4BB
			grainy	-	4AA
			grainy	+	4AA
			grainy	+	4AB
			grainy	-	4AB
			non-grainy	-	4AB
			non-grainy	+	4AB
			grainy	-	4AB
			grainy	+	4AB
			non-grainy	-	4AB
			non-grainy	+	4AA
			non-grainy	-	3BB
			grainy	-	4BA
			grainy	+	4AA
			non-grainy	+	4AB
			non-grainy	+	4AB
			grainy	+	4AA
			non-grainy	-	3BC
			grainy	+	4AA
			grainy	+	4AB
			grainy	+	4AA
			non-grainy	-	4BA
			grainy	+	4AB
			non-grainy	-	4AB
			non-grainy	+	4AB
			grainy	+	4AB
			grainy	+	4AA
			grainy	-	3AB
			non-grainy	+	4AA
			grainy	+	4AA
			non-grainy	+	4AB
			non-grainy	-	4AB
			non-grainy	+	4AB
			grainy	-	4AA
			non-grainy	-	4AB
			non-grainy	-	4BC
			grainy	+	4AB
			grainy	+	4AB
			grainy	-	4AA
			non-grainy	-	3AB
			non-grainy	-	3BB
			non-grainy	+	3AA
			non-grainy	+	4AB
			grainy	+	4AA
			non-grainy	+	3AB

## Sheet: Sheet2
	grainy	3BB				TP	FP	TN	FN							TN	FN	TP	FP
0	1	1				84	40	65	45							84	40	65	45
1	1	1				124	102	3	5							124	102	3	5
2	0	1
3	0	1						chemical preg	0.551282			grainy/non-grainy	chemical preg	0.551282
4	1	1					３BB	accuracy	0.542735				accuracy	0.636752
5	0	1						precision	0.548673				precision	0.677419
6	0	1						recall	0.96124				recall	0.651163
7	0	1						specificity	0.0285714				specificity	0.619048
8	0	1						F-measure1	0.698592				F-measure1	0.664032
9	1	1						F-measure0.5	0.600194				F-measure0.5	0.672
10	0	1						F-measure2	0.83558				F-measure2	0.65625
11	0	1				cli				posi	nega
12	1	1				posi	nega		3BB	127	107				prediction by graininess	≧Gardner 3BB	hCG+rate
13	0	1		grainy/non-grainy	posi	80	69		grainy/nongrainy	149	85				0.636752	0.542735	0.551282
14	0	1			nega	47	38
15	1	1
16	1	1
17	1	1
18	0	0
19	0	1
20	0	1
21	1	1
22	1	1
23	0	1							prediction by graininess	hCG+ & aborted
24	1	1						abort rate	0.261905	0.232558
25	1	1
26	1	1
27	1	0
28	1	1
29	0	1
30	1	1
31	0	1
32	1	1
33	0	1
34	1	0
35	0	1
36	1	1
37	1	1
38	0	1
39	1	1
40	1	1
41	1	1
42	1	1
43	1	1
44	0	1
45	1	1
46	1	1
47	1	1
48	1	1
49	1	1
50	1	1
51	1	1
52	0	1
53	0	1
54	0	1
55	1	1
56	1	0
57	1	0
58	1	1
59	1	1
60	0	1
61	0	1
62	1	1
63	1	1
64	0	1
65	0	1
66	0	1
67	1	0
68	1	1
69	0	1
70	1	1
71	0	1
72	1	1
73	1	1
74	1	1
75	0	1
76	0	1
77	0	1
78	0	1
79	1	1
80	1	1
81	0	1
82	0	1
83	1	1
84	0	1
85	0	1
86	0	1
87	0	1
88	1	1
89	1	1
90	1	1
91	0	1
92	1	1
93	1	1
94	0	1
95	0	1
96	1	0
97	0	1
98	0	1
99	0	1
100	1	1
101	1	1
102	0	1
103	1	1
104	1	1
105	0	1
106	1	1
107	1	1
108	0	1
109	0	1
110	1	1
111	1	1
112	0	1
113	1	1
114	1	1
115	0	1
116	1	1
117	1	1
118	0	1
119	1	1
120	0	1
121	1	1
122	0	1
123	0	1
124	0	1
125	0	1
126	0	1
127	1	1
128	1	1
129	0	1
130	0	1
131	1	1
132	1	1
133	1	1
134	0	1
135	0	1
136	0	1
137	1	1
138	1	1
139	1	1
140	0	1
141	1	1
142	1	1
143	1	1
144	0	1
145	0	1
146	1	1
147	1	1
148	1	1
149	1	1
150	1	1
151	1	1
152	0	1
153	1	1
154	0	1
155	1	1
156	0	1
157	0	1
158	1	0
159	1	1
160	1	1
161	0	1
162	1	1
163	0	1
164	1	1
165	0	1
166	0	1
167	1	1
168	0	1
169	0	1
170	1	1
171	1	1
172	0	1
173	1	1
174	1	1
175	0	1
176	0	1
177	0	1
178	0	1
179	1	1
180	1	1
181	1	1
182	0	1
183	1	1
184	0	1
185	1	1
186	0	1
187	0	1
188	0	1
189	0	1
190	1	1
191	1	1
192	1	1
193	1	1
194	0	1
195	0	1
196	1	1
197	1	1
198	0	1
199	0	1
200	0	1
201	1	1
202	1	1
203	0	1
204	0	1
205	1	1
206	0	1
207	1	1
208	1	1
209	1	1
210	0	1
211	1	1
212	0	1
213	0	1
214	1	1
215	1	1
216	1	1
217	0	1
218	1	1
219	0	1
220	0	1
221	0	1
222	1	1
223	0	1
224	0	1
225	1	1
226	1	1
227	1	1
228	0	1
229	0	1
230	0	1
231	0	1
232	1	1
233	0	1

## Sheet: Sheet3
PC3_hCG(-)		-18.42222792 653.7206223 46.96104664 551.87893958 1247.64423283 423.35996239 -581.22192043 794.06486114 -244.86490492 351.3435996 -338.3869504 425.70240815 -1354.30459572 -24.90650236 -290.78688868 -241.94558667 166.31279981 -634.8636024 -286.49105689 242.40303391 -471.63014066 -227.85699763 139.24543725 524.27084416 180.11762255 -482.99098553 407.04388975 -145.04979219 -131.03651722 136.45119935…
PC3_hCG(+)		-5.30208829e+02 4.31490449e+02 -2.34115372e+02 1.01320936e+03 7.96200582e+01 3.16552325e+02 8.44491329e+01 -7.83233679e+00 -4.44744313e+01 -6.92739754e+01 5.18075392e+02 3.52331153e+02 -4.71294381e+02 2.47677384e+02 2.95896914e+02 2.50480839e+01 1.96733483e+01 6.25638466e+00 1.43881502e+02 3.60354679e+02 -1.95361702e+02 2.46658347e+02 2.97383567e+02 -6.72491371e+01 1.14001989e+02 4.58203498e+02 7…
PC23_hCG(-)		29.9201384 -89.99385567 255.77785794 196.12793222 -56.06946622 -24.24216016 -154.74293037 63.17784341 229.79315716 -91.99921028 -14.67333255 -128.23712403 -36.75747204 151.16570157 159.06625169 -43.62721414 -137.05713831 244.3390086 -289.83844395 -6.401591 66.55780773 -14.95830052 -20.83892934 -32.26542809 -49.94174404 -139.38224283 100.3632417 -68.85138511 168.54845743 -36.18868949 51.85182943 7…
PC23_hCG(+)		-2.03191388e+02 -1.52706716e+02 -2.09024398e+02 -6.80984926e+00 -3.08222754e+01 -2.06370748e+02 -2.32199109e+01 3.65179423e+02 7.95349456e+01 -1.02406549e+01 7.70029036e+01 -1.15283252e+02 -5.96850839e+01 4.71830208e+00 -8.32266187e+01 -3.33620975e+02 5.87138739e+02 9.13091853e+00 -3.26084083e+02 -2.16377037e+02 -5.05869181e+01 3.11391373e+02 1.14468647e+02 -6.61970453e+01 -2.20204991e+02 2.91526…

## Sheet: Sheet4
graininess (0: grainy, 1: non-grainy)	BMI	AMH	timing for blastocyst evaluation
0	22.9	4.52	5
0	22.9	4.52	5
1	19	2.61	5
1	22.1	6.94	5
0	20.4	2.15	5
1	20.4	2.15	5
1	22.5	6.42	6
1	20.8	5.12	5
1	20.8	5.12	5
0	17.7	3.1	5
1	19	9.03	5
1	19.7	0.2	5
0	20.6	6.66	5
1	20.6	6.66	5
1	20.6	6.66	5
0	18.6	3.71	5
0	19.7	14.27	5
0	19.6	4.62	6
1	19.6	4.62	6
1	18.1	2.49	6
1	18.1	2.49	6
0	18.1	2.49	5
0	27.2	4.32	6
1	18.3	5.52	5
0	18.9	2.79	5
0	22.7	5.47	5
0	27.3	3.81	5
0	20.3	2.61	5
0	20.3	2.61	5
1	20.3	2.61	5
0	21.1	6.47	5
1	19.6	1.39	5
0	18.8	12.05	6
1	18.8	12.05	5
0	18.8	12.05	5
1	21.3	1.86	6
0	19.1	2.6	7
0	20.5	2.33	5
1	19.8	4.28	5
0	20.6	1.43	6
0	19.4	1.56	6
0	19.4	1.56	5
0	18.1	8.54	5
0	18.1	8.54	5
1	18.6	3.59	5
0	26.9	1.34	5
0	19.5	5.41	5
0	20.4	4.38	6
0	20.4	4.38	5
0	19.4	3.04	5
0	18	5.18	5
0	20.4	16.11	5
1	20.4	16.11	5
1	19.1	5.43	6
1	17.2	1.08	5
0	19.4	8.65	5
0	19.4	8.65	6
0	19.1	0.49	5
0	19.1	0.49	5
0	19.5	1.1	5
1	19.3	4.01	5
1	22.5	5.02	5
0	19.8	6.65	5
0	18.4	6.05	5
1	17.7	1.59	5
1	20.4	4.59	5
1	20.4	4.59	5
0	20.4	4.59	6
0	27.6	4.48	5
1	27.6	4.48	5
0	27.6	4.48	6
1	27.6	4.48	5
0	20.6	0.95	5
0	20.6	0.95	6
0	20.2	4.37	5
1	20.2	4.37	5
1	21.4	21.9	5
1	20	9.02	5
1	17	3.01	5
0	23.6	1.49	5
0	23.6	1.49	5
1	21	8.42	6
1	17.4	2.85	5
0	19.4	4.85	5
1	19.4	4.85	5
1	20.3	6.4	5
1	20.3	6.4	6
1	20.3	6.4	6
0	20.8	5.3	5
0	20.8	5.3	6
0	19.5	5.28	5
1	19.5	5.28	5
0	23.1	2.94	5
0	30.4	8.51	5
1	30.4	8.51	6
1	19.3	7.79	5
0	24.4	9.68	5
1	20.5	17.52	5
1	20.5	17.52	5
1	21.2	3.94	5
0	19.1	6.21	5
0	18.6	3.22	6
1	18.6	3.22	5
0	16	4.07	5
0	16	4.07	5
1	21.3	6.15	5
0	21.3	6.15	6
0	21.3	6.15	5
1	20.2	5.68	6
1	20.9	5.82	5
0	20.9	5.82	5
0	19.3	2.34	5
1	19.3	2.34	5
0	20	3.24	6
0	20	3.24	5
1	25.1	0.64	5
0	18.7	7.06	5
0	18.8	4.42	5
1	18.8	4.42	5
0	18.9	12.9	5
1	19.5	2.5	5
0	20.8	4.58	5
1	19.8	3	6
1	20.8	4.09	5
1	20.8	4.09	5
1	17	4.58	5
1	17	4.58	6
0	19.5	4.93	6
0	19.5	4.93	6
1	19	3.2	6
1	19	3.2	5
0	20.5	10	5
0	20.5	10	6
0	22.6	3.43	6
1	20.7	4.68	5
1	20.6	2.51	6
1	17.9	1.45	5
0	21.7	1.14	5
0	23.6	2.17	6
0	22.8	2.89	5
1	22.8	2.89	5
0	24.1	8.41	5
0	20.1	9.04	5
0	21.7	7.4	5
1	26.1	1.16	5
1	24.2	4.47	5
0	19.9	3.04	5
0	22.4	3.38	5
0	28	2.5	5
0	18.8	9.17	6
0	26.4	2.3	5
0	26.4	2.3	6
1	21.4	0.3	5
0	25.3	0.57	6
1	19.4	6.8	6
0	19.4	6.8	6
1	19	7.55	5
1	18.7	5.08	6
0	18.7	5.08	6
0	23.4	0.85	5
0	23.4	0.85	5
1	19.1	5.99	5
0	24.2	11.97	5
1	19.3	9.9	5
0	20.4	6.12	5
1	26.3	4.21	5
1	18.9	2	5
0	23.4	1.42	5
1	21.5	6.29	5
1	17.3	6.21	5
0	17.9	8.38	5
0	17.9	8.38	5
1	23.9	5.6	5
0	18.6	2.2	6
0	18.6	2.2	5
1	22.3	3.5	5
1	19.6	4.38	5
1	19.6	4.38	5
1	18.4	4.96	7
0	18.9	2.65	5
0	22.5	3.79	5
0	18.9	6.33	5
1	18.9	6.33	5
0	18.9	6.33	6
1	19	9.23	5
0	18.1	0.44	5
1	18.6	3.77	5
1	23.1	6.09	6
1	23.1	6.09	5
1	23.1	6.09	6
0	18.4	6.94	5
0	18.4	6.94	5
0	18.4	6.94	5
0	27.6	5.28	5
1	27.6	5.28	5
1	21.4	4.05	5
0	21.4	4.05	5
0	20.4	5.82	5
1	20.4	5.82	6
1	19.2	2.04	6
1	19.2	2.04	6
0	20.2	1.28	5
0	24.7	2.35	5
1	24.7	2.35	6
1	18.2	6.4	5
0	22.1	5.99	5
1	18.6	4.09	5
0	17.7	14.2	6
0	20.1	1.42	7
0	31.6	4.43	5
1	19	5.05	6
0	19	5.05	6
1	19	12.05	6
1	18.8	11.89	5
0	22.7	9.21	5
0	20.8	6.43	5
0	20.8	6.43	5
1	25.2	2.49	5
0	20.3	3.48	5
1	19.5	3.35	5
1	19.5	3.35	6
1	17.2	11.84	5
0	28.1	3.56	5
1	21.8	6.96	5
1	18.8	3.19	6
0	19.1	4.5	6
0	19.8	5.79	5
0	17.5	5.83	5
1	20.2	1.01	6
1	19.5	8.85	5
1	17.6	9.3	5
1	19	0.77	5
0	19.7	5.25	5
1	16.1	6.52	6
