# Supplementary material for: Search for morphological indicators that predict implantation by principal component analysis using images of blastocyst
Source: PeerJ. 2022 May 16;10:e13441. doi: 10.7717/peerj.13441 (PMC9119295; doi:10.7717/peerj.13441)
Supplement: Supplemental Information 3 — Results of statistical analysis on each PC, contribution rate, and cumulative contribution ratio. [file peerj-10-13441-s003.xlsx]

## Sheet: Sheet1
PC	KS-test P	AUC	threthold	(-) shapiro	(+) shapiro	levene P	student-t	wilcox
1	0.0874338
2	0.833256
3	0.0197216	0.58	-207.657	0.0159793	0.0014427	0.014	0.0366735	-
4	0.971264
5	0.993915
6	0.807373
7	0.0527041
8	0.323045
9	0.0759296
10	0.0625162
11	0.256288
12	0.409941
13	0.20208
14	0.421702
15	0.544825
16	0.513036
17	0.770795
18	0.185878
19	0.45167
20	0.607136
21	0.628918
22	0.0544488
23	0.0297647	0.59	29.9201	0.2353	0.000112999	-	-	0.0202
24	0.297051
25	0.635331

## Sheet: Sheet2
PC	Contribution ratio	Cumulative contribution ratio
1	0.2828	0.2828
2	0.0593	0.3421
3	0.0414	0.3836
4	0.035	0.4186
5	0.0266	0.4452
6	0.0193	0.4645
7	0.0175	0.4819
8	0.0165	0.4985
9	0.0139	0.5124
10	0.0125	0.5249
11	0.0121	0.537
12	0.0114	0.5484
13	0.0109	0.5594
14	0.01	0.5694
15	0.0093	0.5787
16	0.0087	0.5874
17	0.0083	0.5957
18	0.0079	0.6035
19	0.0075	0.6111
20	0.0074	0.6185
21	0.0071	0.6255
22	0.0069	0.6325
23	0.0064	0.6389
24	0.0061	0.645
25	0.006	0.651
